# Supplementary material
Source: ML conference proceedings conference paper supplement (https://openaccess.thecvf.com/content/WACV2024/html/Zhang_Improving_the_Fairness_WACV_2024_paper.html)
Supplement: Supplementary file 1 [file Zhang_Improving_the_Fairness_WACV_2024_supplemental.pdf]

# Supplementary Material of Improving the Fairness of the Min-Max Game in GANs Training

Zhaoyu Zhang, Yang Hua, Hui Wang, Seán McLoone  
Queen's University Belfast

{zzhang55, Y.Hua, h.wang, s.mcloone}@qub.ac.uk

## 1. Proofs

**Theorem 1.** Theoretical analysis of IGGAN.

**Case 1: IGGAN with NDA in  $D_1$  and PDA in  $D_2$**

Let  $\bar{P} \in \mathbb{P}(\chi)$  be any distribution over  $\chi$  with disjoint support than  $p_{data}$ , such that  $supp(p_{data}) \cap supp(\bar{P}) = \emptyset$ . Let  $P^T \in p_{data}$  be any distribution over real data. Let  $D_1 : \chi \rightarrow \mathbb{R}$  and  $D_2 : \chi \rightarrow \mathbb{R}$  be the set of discriminators over  $\chi$ ,  $f : \mathbb{R}_{\geq 0} \rightarrow \mathbb{R}$  be a convex, semi-continuous function such that  $f(1) = 0$ ,  $f^*$  be the convex conjugate of  $f$ ,  $f'$  be the derivative of  $f$ ,  $G_\theta$  be a distribution with sample space  $\chi$ , and  $G_\theta^T \in G_\theta$  be any distribution over sample space  $\chi$ .  $T$  is one kind of PDA method. Then  $\forall \lambda \in (0, 1]$ , we have

$$\begin{aligned} & \underset{G_\theta \in P(\chi)}{\operatorname{argmin}} \max_{D_1, D_2: \chi \rightarrow \mathbb{R}} L_f(G_\theta, D_1, D_2) \\ &= \underset{G_\theta \in P(\chi)}{\operatorname{argmin}} \max_{D_1, D_2: \chi \rightarrow \mathbb{R}} L_f(\lambda G_\theta + (1 - \lambda)\bar{P}, D_1, D_2) \\ &= p_{data}, \end{aligned} \quad (\text{S1})$$

where  $L_f(G_\theta, D_1, D_2) = E_{x \sim p_{data}}[D_1(x)] - E_{x \sim G_\theta}[f^*(D_1(x))] + E_{x \sim p_{data}}[D_2(T(x))] - E_{x \sim G_\theta}[f^*(D_2(T(x)))]$  is the objective function for IGGAN following NDA-GAN [5] and f-GAN [4]. The optimal discriminators for  $D_1$  and  $D_2$  are different, shown as follows:

$$\underset{D_1: \chi \rightarrow \mathbb{R}}{\operatorname{argmax}} L_f(\lambda G_\theta + (1 - \lambda)\bar{P}, D_1) \quad (\text{S2})$$

$$= f'(p_{data}/(\lambda G_\theta + (1 - \lambda)\bar{P})).$$

$$\underset{D_2: \chi \rightarrow \mathbb{R}}{\operatorname{argmax}} L_f(G_\theta, D_2) = f'(P^T/G_\theta^T). \quad (\text{S3})$$

*Proof.* Let  $p(x)$ ,  $\bar{p}(x)$ ,  $p^T(x)$  and  $q(x)$  denote the density functions of  $p_{data}$ ,  $\bar{P}$ ,  $P^T$  and  $G_\theta$  respectively (and  $P$ ,  $\bar{P}$ ,  $P^T$ ,  $Q$  for the respective distributions). For  $D_1$ , following Theorem 1 and Appendix C as in [5], we can obtain the conclusion that we must have  $q(x) = p(x)$  for all  $x \in \chi$  in  $D_1$ . Thus, the generator distribution recovers the data distribution at the Nash equilibrium. For  $D_2$ , according to Theorem 1 and section V.B in [6], the generator distribution still recovers the data distribution at the Nash equilibrium.

To sum up, the generator distribution recovers the data

distribution at the Nash equilibrium for both  $D_1$  and  $D_2$ , which guarantees the convergence of IGGAN.

Moreover, from Lemma 1 in [3], we have that

$$\underset{D: \chi \rightarrow \mathbb{R}}{\operatorname{argmax}} L_f(Q, D) = f'(p_{data}/Q). \quad (\text{S4})$$

Therefore, by replacing  $Q$  with  $\lambda G_\theta + (1 - \lambda)\bar{P}$  in  $D_1$  and  $p_{data}$  with  $P^T$  as well as  $Q$  with  $G_\theta^T$  in  $D_2$ , we have

$$\underset{D_1: \chi \rightarrow \mathbb{R}}{\operatorname{argmax}} L_f(\lambda G_\theta + (1 - \lambda)\bar{P}, D_1) \quad (\text{S5})$$

$$= f'(p_{data}/(\lambda G_\theta + (1 - \lambda)\bar{P})),$$

$$\underset{D_2: \chi \rightarrow \mathbb{R}}{\operatorname{argmax}} L_f(G_\theta, D_2) = f'(P^T/G_\theta^T). \quad (\text{S6})$$

Eq.(S5) and Eq.(S6) show that the optimal discriminators are indeed different for the  $D_1$  and  $D_2$ .  $\square$

**Case 2: IGGAN with different PDAs in  $D_1$  and  $D_2$**

Let  $P^{T_1}, P^{T_2} \in p_{data}$  be any distribution over real data. Let  $D_1 : \chi \rightarrow \mathbb{R}$  and  $D_2 : \chi \rightarrow \mathbb{R}$  be the set of discriminators over  $\chi$ ,  $f : \mathbb{R}_{\geq 0} \rightarrow \mathbb{R}$  be a convex, semi-continuous function such that  $f(1) = 0$ ,  $f^*$  be the convex conjugate of  $f$ ,  $f'$  be the derivative of  $f$ ,  $G_\theta$  be a distribution with sample space  $\chi$ , and  $G_\theta^{T_1}, G_\theta^{T_2} \in G_\theta$  be any distribution over sample space  $\chi$ .  $T_1$  and  $T_2$  are different PDA methods. Then  $\forall \lambda \in (0, 1]$ , we have

$$\underset{G_\theta \in P(\chi)}{\operatorname{argmin}} \max_{D_1, D_2: \chi \rightarrow \mathbb{R}} L_f(G_\theta, D_1, D_2) = p_{data}, \quad (\text{S7})$$

where  $L_f(G_\theta, D_1, D_2) = E_{x \sim p_{data}}[D_1(T_1(x))] - E_{x \sim G_\theta}[f^*(D_1(T_1(x)))] + E_{x \sim p_{data}}[D_2(T_2(x))] - E_{x \sim G_\theta}[f^*(D_2(T_2(x)))]$  is the objective function for IGGAN following NDA-GAN [5] and f-GAN [4]. The optimal discriminators for  $D_1$  and  $D_2$  are different, shown as follows:

$$\underset{D_1: \chi \rightarrow \mathbb{R}}{\operatorname{argmax}} L_f(G_\theta, D_1) = f'(P^{T_1}/G_\theta^{T_1}). \quad (\text{S8})$$

$$\underset{D_2: \chi \rightarrow \mathbb{R}}{\operatorname{argmax}} L_f(G_\theta, D_2) = f'(P^{T_2}/G_\theta^{T_2}). \quad (\text{S9})$$

*Proof.* Let  $p(x)$ ,  $p^{T_1}(x)$ ,  $p^{T_2}(x)$  and  $q(x)$  denote the density functions of  $p_{data}$ ,  $P^{T_1}$ ,  $P^{T_2}$  and  $G_\theta$  respectively (and  $P$ ,

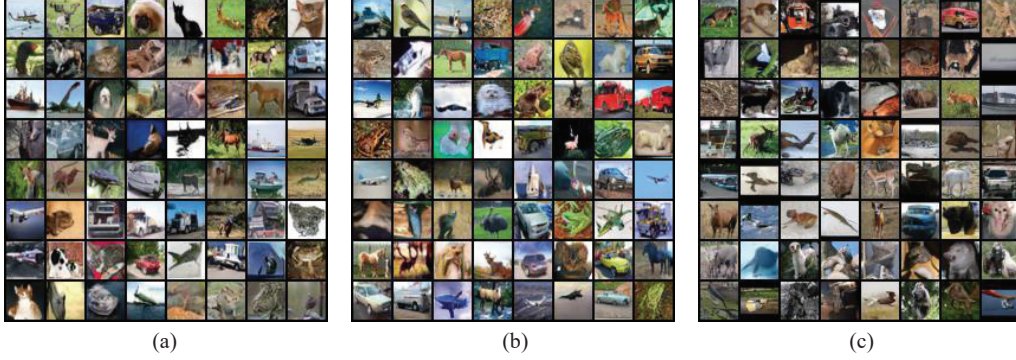

Figure S1. Images generated on the CIFAR-10 and STL-10 datasets by IGGAN: (a) Unconditional generation results on CIFAR-10 by IGGAN with Diff-Augment as PDA and Jigsaw as NDA (FID 10.68). (b) Conditional generation results on CIFAR-10 by IGGAN with Diff-Augment as PDA and Cutmix as NDA (FID 8.15). Unconditional generation results on STL-10 by IGGAN with Diff-Augment as PDA and Jigsaw as NDA (FID 21.39). *Best viewed in color.*

$P^{T_1}, P^{T_2}, Q$  for the respective distributions). For both  $D_1$  and  $D_2$ , following Theorem 1 and section V.B in [6], we can conclude that the generator distribution recovers the data distribution at the Nash equilibrium.

To conclude, the generator distribution recovers the data distribution at the Nash equilibrium for both  $D_1$  and  $D_2$ , which guarantees the convergence of IGGAN.

Moreover, from Lemma 1 in [3], we have that

$$\operatorname{argmax}_{D: \mathcal{X} \rightarrow \mathbb{R}} L_f(Q, D) = f'(p_{data}/Q). \quad (\text{S10})$$

Therefore, by replacing  $p_{data}$  with  $P^{T_1}$  and  $Q$  with  $G_\theta^{T_1}$  in  $D_1$  and  $p_{data}$  with  $P^{T_2}$  and  $Q$  with  $G_\theta^{T_2}$  in  $D_2$ , we have

$$\operatorname{argmax}_{D_1: \mathcal{X} \rightarrow \mathbb{R}} L_f(G_\theta, D_1) = f'(P^{T_1}/G_\theta^{T_1}). \quad (\text{S11})$$

$$\operatorname{argmax}_{D_2: \mathcal{X} \rightarrow \mathbb{R}} L_f(G_\theta, D_2) = f'(P^{T_2}/G_\theta^{T_2}). \quad (\text{S12})$$

Eq.(S10) and Eq.(S11) show that the optimal discriminators are indeed different for  $D_1$  and  $D_2$ .

□

The training algorithms of IGGAN (NDA + PDA) and IGGAN (PDA + PDA) are shown in Algorithms 1 and 2, respectively.

## 2. More Generated Images

According to the main paper, more generated results with IGGAN (BigGAN backbone [1]) on CIFAR-10/STL-10, CIFAR-100 and CelebA are shown in Figures S1, S2 and S3, respectively. More generated results with IGGAN (StyleGAN2 backbone [2]) on FFHQ and LSUNCAT datasets are shown in Figure S4.

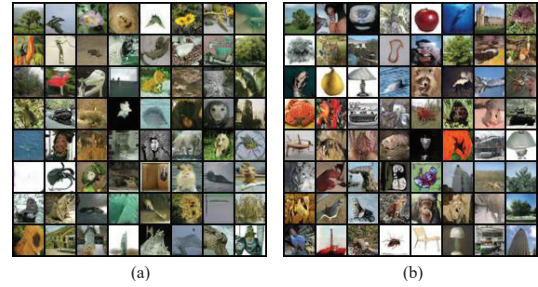

Figure S2. Images generated on the CIFAR-100 dataset by IGGAN: (a) Unconditional generation results on CIFAR-100 by IGGAN with Diff-Augment as PDA and Jigsaw as NDA (FID 16.08). (b) Conditional generation results on CIFAR-100 by IGGAN with Diff-Augment as PDA and Jigsaw as NDA (FID 11.30). *Best viewed in color.*

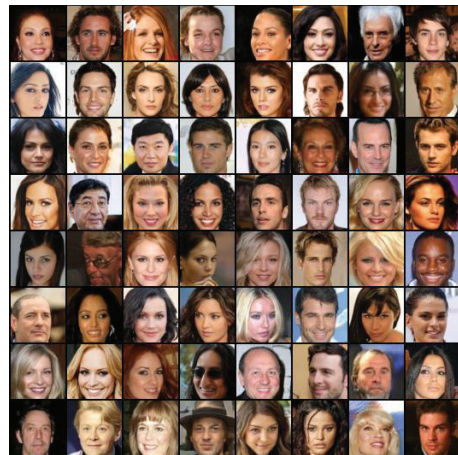

Figure S3. Unconditional images generated on the CelebA dataset by IGGAN (FID 20.63). *Best viewed in color.*



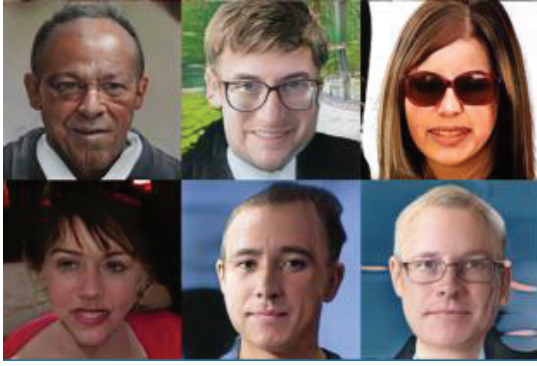

FFHQ-1K FID 20.16

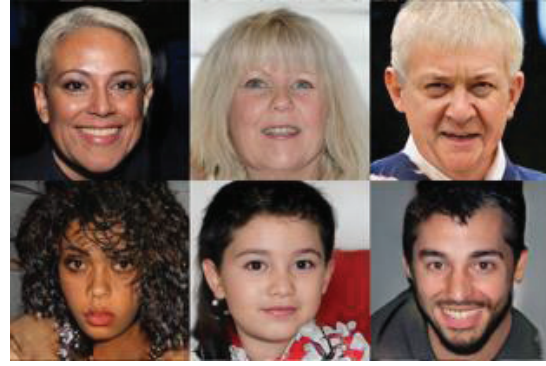

FFHQ-5K FID 9.47

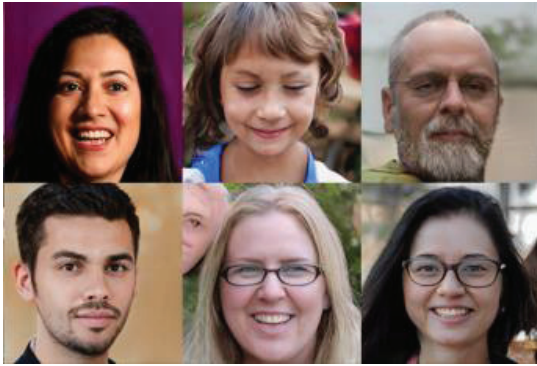

FFHQ-10K FID 7.14

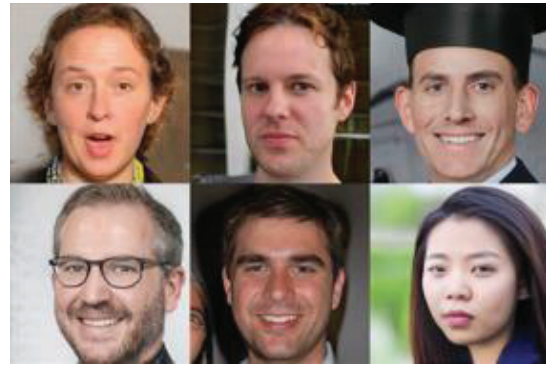

FFHQ-30K FID 4.89

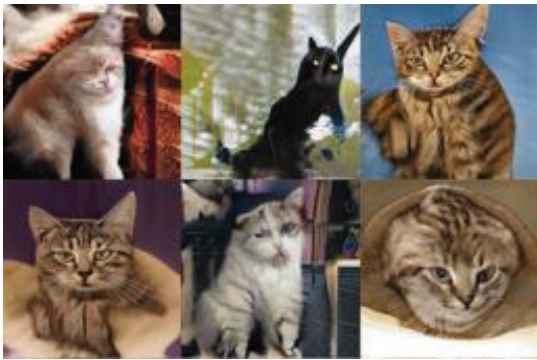

LSUNCAT-1K FID 30.80

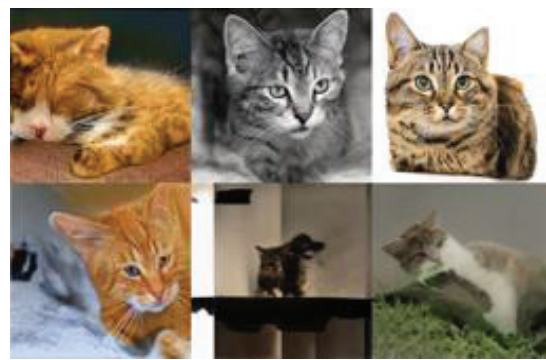

LSUNCAT-5K FID 15.85

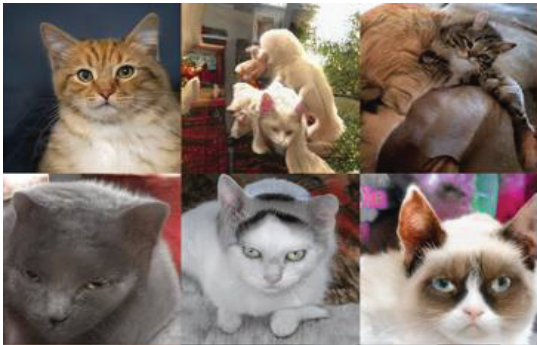

LSUNCAT-10K FID 11.20

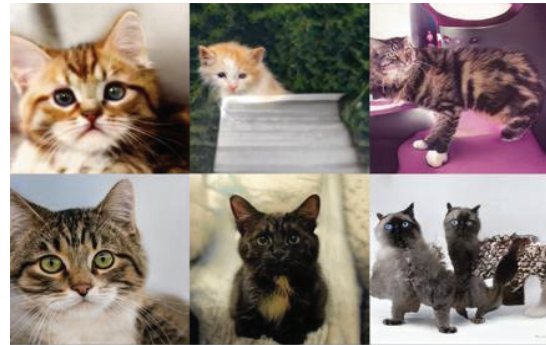

LSUNCAT-30K FID 9.14

Figure S4. Image generated by IGGAN (PDA + PDA) on FFHQ and LSUNCAT datasets. Following Diff-Augment [7], we perform generated results on 30K, 10K, 5K and 1K training samples. *Best viewed in color.*

---

**Algorithm 1** Training algorithm for IGGAN (NDA + PDA).

---

**Require:** The number of  $D_1$  iterations  $n_{D_1}$ , the number of  $D_2$  iterations  $n_{D_2}$ , batchsize  $m = 64$ ,  $f_{1_w}(x) = E_{x \sim p_{data}}[D_{1_w}(x)]$  and  $f_{1_w}^1 = -E_{x \sim G_\theta}[f^*(D_{1_w}(x))]$  determine the objective function of  $D_{1_w}$ ,  $f_{2_w} = E_{x \sim p_{data}}[D_{2_w}(T(x))]$  and  $f_{2_w}^2 = -E_{x \sim G_\theta}[f^*(D_{2_w}(T(x)))]$  determine the objective function of  $D_{2_w}$ , where  $T$  is one PDA method.  $\bar{P}$  is the distribution of the NDA.  $w$  and  $\theta$  are the parameters of the  $D$ s and  $G$ , respectively.

**while**  $\theta$  has not converged **do**

**for**  $t=1, \dots, n_{D_1}$  **do**

    Samples  $\{x^{(i)}\}_{i=1}^m \sim P_{data}$

    Samples  $\{z^{(i)}\}_{i=1}^m \sim P_z$

    Update  $w$  using SGD by ascending with:

$$\nabla_w \frac{1}{m} \sum_{i=1}^m [f_{1_w}(x^{(i)}) + f_{1_w}^1((1 - \lambda)\bar{P} + \lambda G_\theta(z^{(i)}))]$$

**end for**

  Samples  $\{x^{(i)}\}_{i=1}^m \sim P_{data}$

  Samples  $\{z^{(i)}\}_{i=1}^m \sim P_z$

  Update  $\theta$  using SGD by ascending with:

$$\nabla_\theta \frac{1}{m} \sum_{i=1}^m f_{1_w}^1(G_\theta(z^{(i)}))$$

**for**  $t=1, \dots, n_{D_2}$  **do**

    Samples  $\{x^{(i)}\}_{i=1}^m \sim P_{data}$

    Samples  $\{z^{(i)}\}_{i=1}^m \sim P_z$

    Update  $w$  using SGD by ascending with:

$$\nabla_w \frac{1}{m} \sum_{i=1}^m [f_{2_w}(x^{(i)}) + f_{2_w}^2(G_\theta(z^{(i)}))]$$

**end for**

  Samples  $\{x^{(i)}\}_{i=1}^m \sim P_{data}$

  Samples  $\{z^{(i)}\}_{i=1}^m \sim P_z$

  Update  $\theta$  using SGD by ascending with:

$$\nabla_\theta \frac{1}{m} \sum_{i=1}^m f_{2_w}^2(G_\theta(z^{(i)}))$$

**end while**

---

## References

- [1] Andrew Brock, Jeff Donahue, and Karen Simonyan. Large scale gan training for high fidelity natural image synthesis. In *ICLR*, 2019. 2
- [2] Tero Karras, Samuli Laine, Miika Aittala, Janne Hellsten, Jaakko Lehtinen, and Timo Aila. Analyzing and improving the image quality of stylegan. In *CVPR*, 2020. 2
- [3] XuanLong Nguyen, Martin J Wainwright, and Michael I Jordan. Estimating divergence functionals and the likelihood ratio by convex risk minimization. *IEEE Transactions on Information Theory*, 56(11):5847–5861, 2010. 1, 2
- [4] Sebastian Nowozin, Botond Cseke, and Ryota Tomioka. f-

---

**Algorithm 2** Training algorithm for IGGAN (PDA + PDA).

---

**Require:** The number of  $D_1$  iterations  $n_{D_1}$ , the number of  $D_2$  iterations  $n_{D_2}$ , batchsize  $m = 64$ ,  $f_{1_w}(x) = E_{x \sim p_{data}}[D_{1_w}(T_1(x))]$  and  $f_{1_w}^1 = -E_{x \sim G_\theta}[f^*(D_{1_w}(T_1(x)))]$  determine the objective function of  $D_{1_w}$ ,  $f_{2_w} = E_{x \sim p_{data}}[D_{2_w}(T_2(x))]$  and  $f_{2_w}^2 = -E_{x \sim G_\theta}[f^*(D_{2_w}(T_2(x)))]$  determine the objective function of  $D_{2_w}$ , where  $T_1$  and  $T_2$  are different PDA methods.  $w$  and  $\theta$  are the parameters of the  $D$ s and  $G$ , respectively.

**while**  $\theta$  has not converged **do**

**for**  $t=1, \dots, n_{D_1}$  **do**

    Samples  $\{x^{(i)}\}_{i=1}^m \sim P_{data}$

    Samples  $\{z^{(i)}\}_{i=1}^m \sim P_z$

    Update  $w$  using SGD by ascending with:

$$\nabla_w \frac{1}{m} \sum_{i=1}^m [f_{1_w}(x^{(i)}) + f_{1_w}^1(G_\theta(z^{(i)}))]$$

**end for**

  Samples  $\{x^{(i)}\}_{i=1}^m \sim P_{data}$

  Samples  $\{z^{(i)}\}_{i=1}^m \sim P_z$

  Update  $\theta$  using SGD by ascending with:

$$\nabla_\theta \frac{1}{m} \sum_{i=1}^m f_{1_w}^1(G_\theta(z^{(i)}))$$

**for**  $t=1, \dots, n_{D_2}$  **do**

    Samples  $\{x^{(i)}\}_{i=1}^m \sim P_{data}$

    Samples  $\{z^{(i)}\}_{i=1}^m \sim P_z$

    Update  $w$  using SGD by ascending with:

$$\nabla_w \frac{1}{m} \sum_{i=1}^m [f_{2_w}(x^{(i)}) + f_{2_w}^2(G_\theta(z^{(i)}))]$$

**end for**

  Samples  $\{x^{(i)}\}_{i=1}^m \sim P_{data}$

  Samples  $\{z^{(i)}\}_{i=1}^m \sim P_z$

  Update  $\theta$  using SGD by ascending with:

$$\nabla_\theta \frac{1}{m} \sum_{i=1}^m f_{2_w}^2(G_\theta(z^{(i)}))$$

**end while**

---

gan: Training generative neural samplers using variational divergence minimization. In *NeurIPS*, 2016. 1

- [5] Abhishek Sinha, Kumar Ayush, Jiaming Song, Burak Uzkent, Hongxia Jin, and Stefano Ermon. Negative data augmentation. In *ICLR*, 2021. 1
- [6] Ngoc-Trung Tran, Viet-Hung Tran, Ngoc-Bao Nguyen, Trung-Kien Nguyen, and Ngai-Man Cheung. On data augmentation for gan training. *IEEE Transactions on Image Processing*, 30:1882–1897, 2021. 1, 2
- [7] Shengyu Zhao, Zhijian Liu, Ji Lin, Jun-Yan Zhu, and Song Han. Differentiable augmentation for data-efficient gan training. In *NeurIPS*, 2020. 3
